# Supplementary material for: The Effect of Acupoint Application of Sinomenine for Rheumatoid Arthritis Measured by Microdialysis and UPLC-MS/MS
Source: Hindawi journal article supplement (doi:10.1155/2019/5135692), 2019-11-28

**Supplementary Table 1.** Criteria for the RA model construction

---

| <b>Index</b>     | <b>Changes</b>                                                                                                 |
|------------------|----------------------------------------------------------------------------------------------------------------|
| Posture          | Apathetic, activities decrease and slowly, joint deformation and cannot be loaded                              |
| Body temperature | Body temperature is gradually increased                                                                        |
| Weight           | Body weight is gradually increased after sensitization, but the rate of increase is gradually slow down        |
| Diet             | Diet reduced after each sensitization and then gradually restored                                              |
| Joint diameter   | Joint diameter is swollen obviously at the day of sensitization, and then restores to about twice the original |

---

**Supplementary Table 2.** Methods of probe implantation

---

**Steps    Processes**

---

- 1 step    Rotatingly insert No. 5 injection needle to the place of drug delivery
  - 2 step    Send a tear tube from the needle into the place of drug delivery
  - 3 step    Pull out the needle and make the tear tube stay at the articular cavity
  - 4 step    Microdialysis probe was inserted into the tear tube along the center of the  
tear tube
  - 5 step    Tear the tear tube to both sides and pull it out simultaneously
  - 6 step    Make sure that the probe was stayed in the articular cavity
-

**Supplementary Table 3.** The concentration of sinomenine in different groups at 14 h

| Time  | Sinomenine concentration (ng/mL; $\bar{x} \pm s$ , n=4) |              |                  |               |
|-------|---------------------------------------------------------|--------------|------------------|---------------|
|       | ST 36 group                                             | GB 34 group  | Knee-joint group | Oral group    |
| 0.5 h | 110.07±22.68                                            | 98.5±24.42   | 147.32±10.12     | 208.85±25.12  |
| 1 h   | 239.26±32.72                                            | 215.85±34.79 | 292.84±20.30     | 472.10±33.74  |
| 2 h   | 433.55±34.09                                            | 336.77±33.99 | 490.89±62.10     | 988.20±51.39  |
| 3 h   | 560.93±45.01                                            | 440.84±46.53 | 583.52±51.32     | 1132.75±55.67 |
| 4 h   | 622.37±29.33                                            | 536.32±30.96 | 624.94±27.46     | 1198.26±46.32 |
| 5 h   | 695.40±35.32                                            | 586.12±29.99 | 560.79±50.71     | 890.02±45.66  |
| 6 h   | 709.73±49.70                                            | 622.07±28.87 | 394.04±38.57     | 621.20±21.77  |
| 7 h   | 677.09±38.83                                            | 582.81±30.71 | 355.57±41.20     | 369.08±24.11  |
| 8 h   | 659.99±18.88                                            | 561.02±29.90 | 417.10±54.10     | 279.05±24.67  |
| 9 h   | 645.95±33.36                                            | 488.70±28.39 | 372.40±27.23     | 253.81±49.07  |
| 10 h  | 624.08±42.21                                            | 494.60±35.70 | 428.10±61.98     | 242.55±29.90  |
| 11 h  | 570.22±33.10                                            | 431.27±28.86 | 383.57±49.88     | 206.32±23.49  |
| 12 h  | 545.99±51.76                                            | 396.25±59.52 | 415.53±60.20     | 193.73±40.01  |
| 13 h  | 488.94±34.43                                            | 378.99±32.65 | 329.09±32.21     | 160.81±25.65  |
| 14 h  | 469.23±24.45                                            | 344.32±29.87 | 305.43±35.65     | 150.99±25.89  |

**Supplementary Figure 1.** The drug package of sinomenine. The drug package was directly attached to the administration site

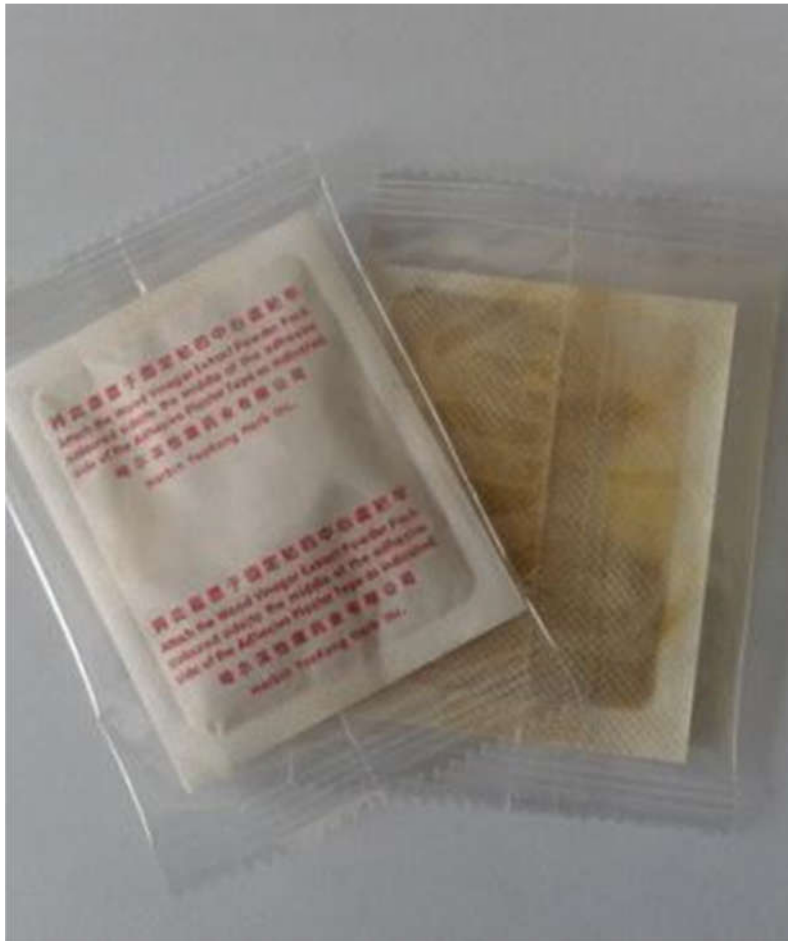

Supplement: f1 [file 5135692.f1.pdf]
